# Supplementary material for: Light-driven methane conversion: unveiling methanol using a TiO 2 /TiOF 2 photocatalyst
Source: Royal Society of Chemistry journal article supplement (doi:10.1039/d4ra00353e), 2024-01-01
Supplement: d4ra00353e1.pdf [file d4ra00353e1.pdf]

*Supporting Information*

**Light-Driven Methane Conversion: Unveiling Methanol using  
TiO<sub>2</sub>/TiOF<sub>2</sub> Photocatalyst**

Wibawa Hendra Saputera,<sup>\*a,b,c</sup> Gita Yuniar,<sup>a</sup> and Dwiwahju Sasongko<sup>a,c</sup>

<sup>a</sup> Research Group on Sustainable Energy and Technology, Department of Chemical Engineering, Faculty of Industrial Technology, Institut Teknologi Bandung, Jl. Ganesha no. 10, Bandung 40132, Indonesia.

<sup>b</sup> Center for Catalysis and Reaction Engineering, Institut Teknologi Bandung, Jl. Ganesha no. 10, Bandung 40132, Indonesia.

<sup>c</sup> Research Center for New and Renewable Energy, Institut Teknologi Bandung, Jl. Ganesha no. 10, Bandung 40132, Indonesia.

Corresponding author: [whsaputera@itb.ac.id](mailto:whsaputera@itb.ac.id) (W.H. Saputera)

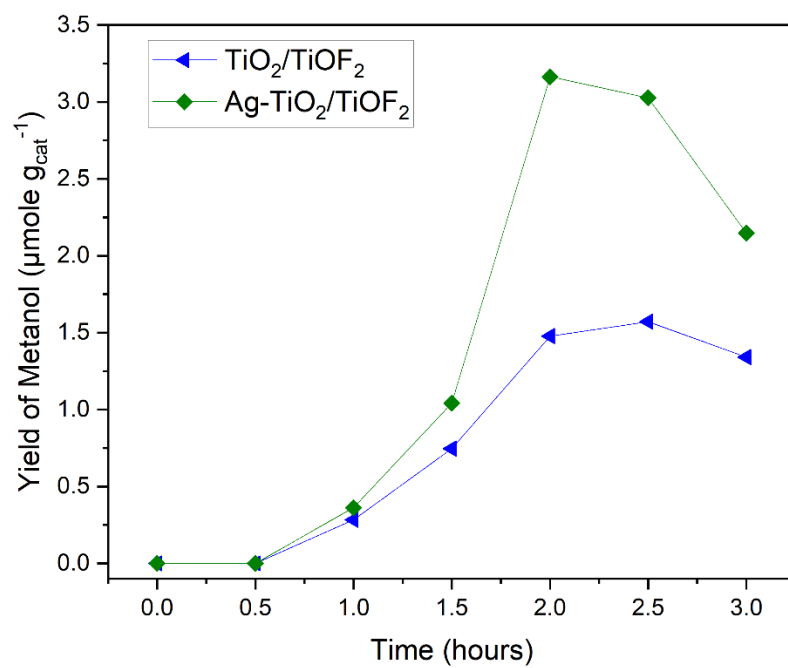

Figure S1. The yield of methanol comparison between  $\text{TiO}_2/\text{TiOF}_2$  and  $\text{Ag-TiO}_2/\text{TiOF}_2$  catalysts

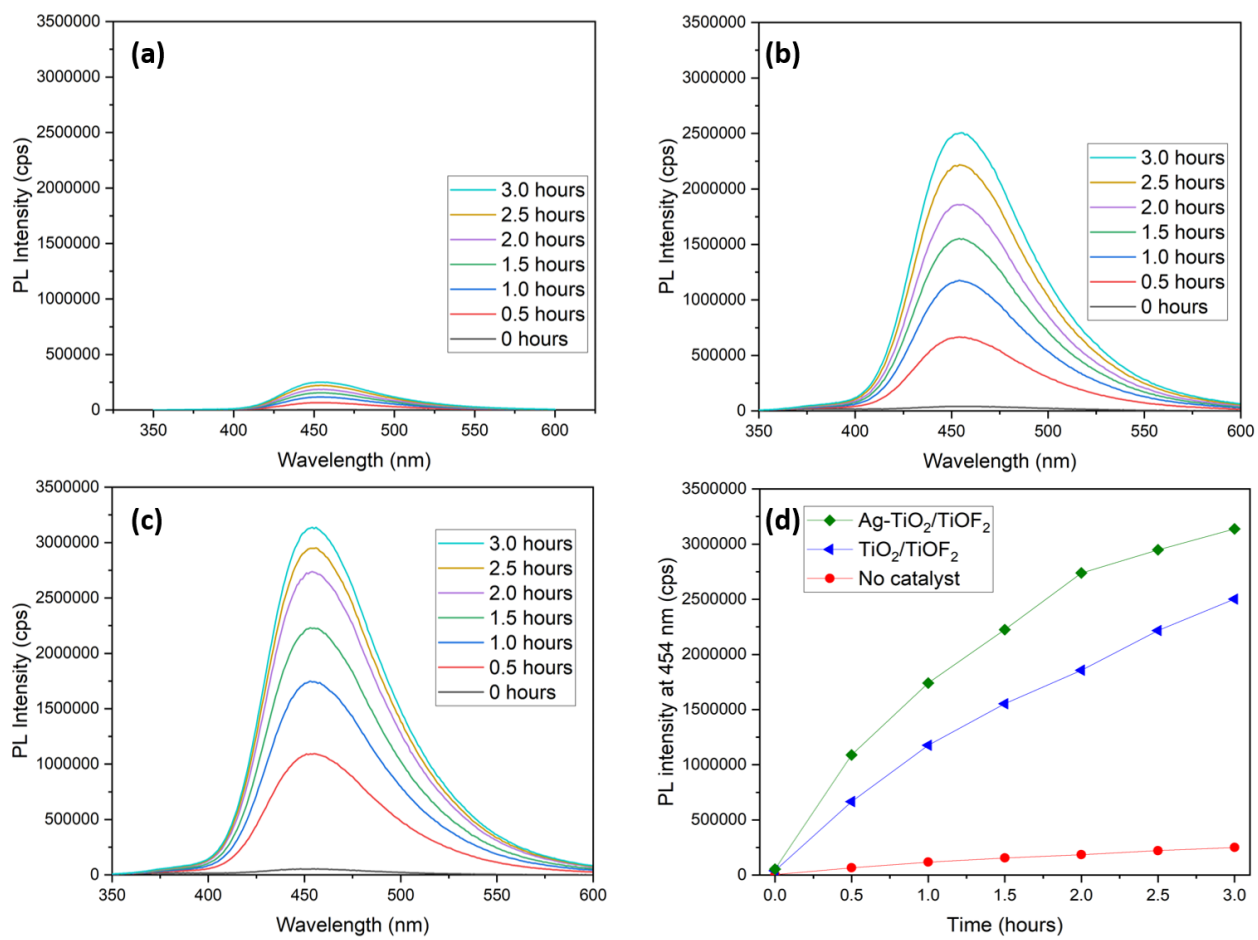

**Figure S2.** Photoluminescence spectra for detection of hydroxyl radicals using coumarin as a probe molecule (a) without catalyst (b)  $\text{TiO}_2/\text{TiOF}_2$  (c)  $\text{Ag-TiO}_2/\text{TiOF}_2$  (d) Photoluminescence signal intensity over time at  $\lambda_{\text{max}} = 454$  nm.

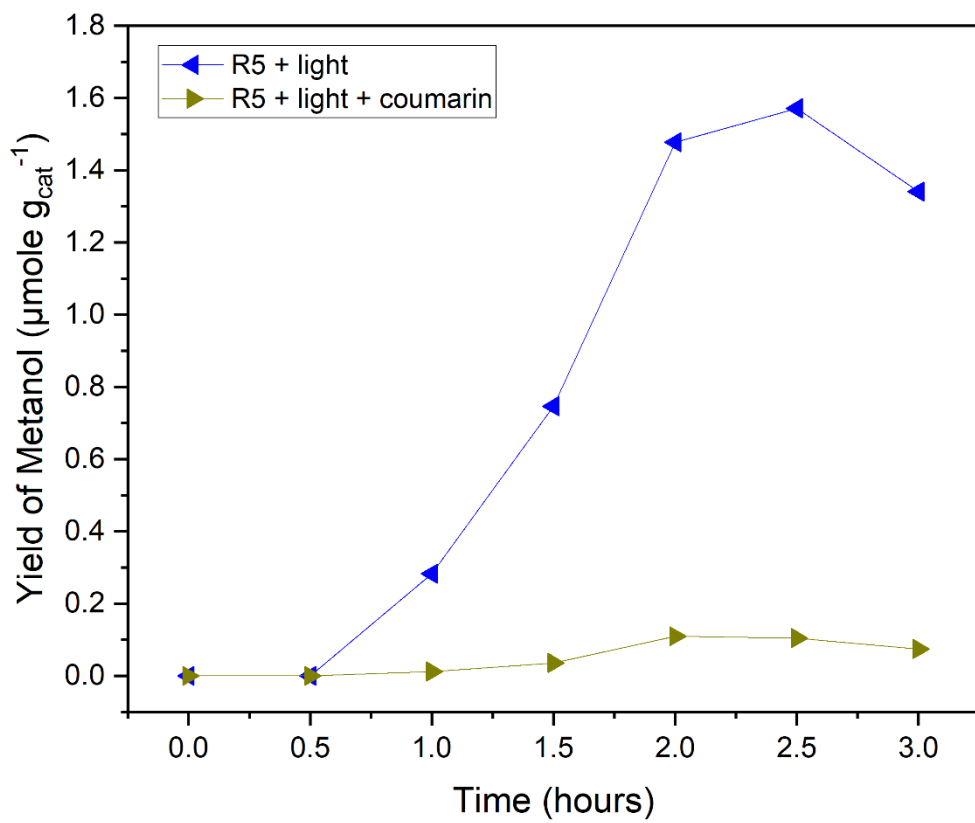

Figure S3. The yield of methanol comparison using  $\text{TiO}_2/\text{TiOF}_2$  (R5) catalysts in the presence and the absence of coumarin as a hydroxyl radical scavenger
